# Supplementary material for: Ammonium triggered the response mechanism of lysine crotonylome in tea plants
Source: BMC Genomics. 2019 May 6;20:340. doi: 10.1186/s12864-019-5716-z (PMC6501322; doi:10.1186/s12864-019-5716-z)
Supplement: Supplementary file 20 — The information of proteins was concerned with DCPs. (XLSX 11 kb) [file 12864_2019_5716_MOESM20_ESM.xlsx]

## Sheet: proteins
Protein accession	Protein description	Sequence coverage [%]	Mol. weight [kDa]	Score	MS/MS Counts	Peptides	Unique peptides	3hN/DN Ratio	3hN/DN P value	3dN/DN Ratio	3dN/DN P value
CSA004763.1	PREDICTED: ribulose bisphosphate carboxylase small chain, chloroplastic-like [Juglans regia]	54	19.754	205.25	630	16	12	1.09	0.305	1.023	0.768
CSA012532.1	PREDICTED: transketolase, chloroplastic [Nelumbo nucifera]	65.3	80.745	323.31	898	36	19	1.096	0.0193355	1.059	0.20942
CSA011908.1	PREDICTED: probable fructose-bisphosphate aldolase 3, chloroplastic [Sesamum indicum]	35.7	42.612	148.13	41	10	5	0.908	0.328	0.898	0.135
CSA020587.1	PREDICTED: ribulose bisphosphate carboxylase small chain, chloroplastic isoform X1 [Juglans regia]	60.9	20.389	198.88	246	15	11	1.132	0.35672	1.154	0.28896
CSA020605.1	ribulose bisphosphate carboxylase large chain (chloroplast) [Camellia crapnelliana]	45.6	34.057	163.95	881	27	10	1.074	0.197	1.072	0.281
CSA005116.1	PREDICTED: fructose-bisphosphate aldolase, cytoplasmic isozyme 1 [Theobroma cacao]	78.2	38.586	323.31	296	21	19	0.903	0.046145	0.901	0.046604
CSA000795.1	PREDICTED: phosphoribulokinase, chloroplastic-like [Populus euphratica]	74.4	44.807	323.31	574	23	14	1.022	0.6222	0.929	0.089803
CSA001723.1	PREDICTED: probable ribose-5-phosphate isomerase 3, chloroplastic [Nicotiana tomentosiformis]	26.6	60.012	134.91	94	9	9	0.909	0.33064	0.902	0.25714
CSA009966.1	PREDICTED: fructose-bisphosphate aldolase 1, chloroplastic [Solanum pennellii]	69.9	43.083	323.31	789	30	29	0.947	0.3052	0.971	0.27356
CSA024921.1	PREDICTED: glutamate--glyoxylate aminotransferase 2-like [Juglans regia]	68.4	53.593	323.31	391	28	18	0.973	0.262	0.917	0.0287
CSA026796.1	PREDICTED: glyceraldehyde-3-phosphate dehydrogenase A, chloroplastic [Nelumbo nucifera]	61.7	43.192	323.31	617	26	21	1.062	0.148278	1.057	0.023321
CSA031519.1	PREDICTED: phosphoglycerate kinase, cytosolic [Vitis vinifera]	76.4	42.607	323.31	428	27	19	1.041	0.20648	1.045	0.047222
CSA034492.1	chloroplast sedoheptulose-1,7-bisphosphatase [Solanum lycopersicum]	51.7	42.466	177.68	271	18	7	1.028	0.61146	1.034	0.131321
CSA020117.1	PREDICTED: glycine dehydrogenase (decarboxylating), mitochondrial [Nelumbo nucifera]	57.2	116.41	323.31	480	41	24	1.039	0.201	0.976	0.35
CSA025613.1	PREDICTED: serine hydroxymethyltransferase, mitochondrial [Nicotiana attenuata]	62.6	57.712	323.31	454	26	11	0.953	0.5349	0.909	0.029256
CSA015996.1	PREDICTED: glycine dehydrogenase (decarboxylating), mitochondrial [Nelumbo nucifera]	57.8	114.75	323.31	683	42	25	1.079	0.070945	0.99	0.5931
CSA024921.1	PREDICTED: glutamate--glyoxylate aminotransferase 2-like [Juglans regia]	68.4	53.593	323.31	391	28	18	0.973	0.262	0.917	0.0287
CSA035317.1	PREDICTED: serine--glyoxylate aminotransferase [Capsicum annuum]	73.2	45.175	323.31	399	18	14	1.038	0.40318	0.967	0.62002
CSA009889.1	PREDICTED: serine hydroxymethyltransferase 4 [Sesamum indicum]	53.5	52.117	276.01	199	19	10	1.1	0.0836	1.109	0.00256
CSA019996.1	PREDICTED: aminomethyltransferase, mitochondrial [Nelumbo nucifera]	67	44.356	298.78	349	23	23	0.981	0.639	0.974	0.668
CSA010160.1	PREDICTED: dihydrolipoyl dehydrogenase 1, mitochondrial [Ricinus communis]	62.1	53.812	323.31	365	21	21	0.992	0.87316	0.984	0.72788
